# Supplementary material for: Review and Evaluation of the Potential Health Effects of Oxidic Nickel Nanoparticles
Source: PubMed Central journal article supplement (PMC7999720; doi:10.3390/nano11030642), 2021-03-05
Supplement: nanomaterials-11-00642-s001.pdf [file nanomaterials-11-00642-s001.pdf]

## *Supplemental Information*

# **Review and Evaluation of the Potential Health Effects of Oxidic Nickel Nanoparticles**

**Sharlee L. More** <sup>1,\*</sup>, **Michael Kovichich** <sup>2</sup>, **Tara Lyons-Darden** <sup>3</sup>, **Michael Taylor** <sup>3</sup>,  
**Alexandra M. Schulte** <sup>4</sup> and **Amy K. Madl** <sup>4</sup>

<sup>1</sup> Cardno ChemRisk, 6720 S Macadam Ave Suite 150, Portland 97219, OR, USA

<sup>2</sup> Cardno ChemRisk, 30 North LaSalle St Suite 3910, Chicago 60602, IL, USA;  
michael.kovichich@cardno.com

<sup>3</sup> NiPERA, 2525 Meridian Parkway, Suite 240, Durham27713, NC, USA;  
TLyons-Darden@nipera.org (T.L.-D.); mtaylor@nipera.org (M.T.)

<sup>4</sup> Cardno ChemRisk, 65 Enterprise Drive Suite 150, Aliso Viejo 92656 CA, USA;  
alex.schulte@cardno.com (A.M.S.); amy.madl@cardno.com (A.K.M.)

\* Correspondence: Sharlee.More@Cardno.com

**Table S1.** Physicochemical nanoparticle characteristics reported in the studies investigating the toxicity of oxidic nickel nanoparticles.

| Study                      | Nanoparticle Type   | Oxidic Nickel Nanoparticle Characteristics |             |               |               |        |       |              |             |                |                |
|----------------------------|---------------------|--------------------------------------------|-------------|---------------|---------------|--------|-------|--------------|-------------|----------------|----------------|
|                            |                     | Agglomeration                              | Composition | Crystallinity | Particle Size | Purity | Shape | Surface Area | Sur. Charge | Sur. Chemistry | Char. in Media |
| Abudayyak et al. [24]      | NiO                 | X                                          |             |               | X             | X      | X     |              |             |                | X              |
| Ada et al. [25]            | NiO                 | X                                          | X           | X             | X             |        | X     | X            |             |                |                |
| Åkerlund et al. [26]       | NiO                 | X                                          |             |               | X             | X      | X     | X            |             |                | X              |
| Ali [27]                   | NiO                 | X                                          |             | X             | X             | X      | X     |              |             |                | X              |
| Bai et al. [28]            | NiO                 | X                                          | X           |               | X             | X      | X     | X            | X           | X              | X              |
| Cao et al. [29]            | NiO                 | X                                          |             |               | X             | X      | X     |              | X           |                | X              |
| Capasso et al. [30]        | NiO                 | X                                          |             |               | X             | X      | X     | X            |             |                | X              |
| Cho et al. [13]            | NiO                 | X                                          |             |               | X             |        |       | X            | X           |                | X              |
| Cho et al. [12]            | NiO                 | X                                          |             |               | X             |        | X     | X            | X           |                | X              |
| Cho et al. [14]            | NiO                 | X                                          |             |               | X             |        |       | X            | X           |                | X              |
| Cuevas et al. [31]         | Ni(OH) <sub>2</sub> | X                                          | X           |               | X             | X      | X     |              |             | X              | X              |
| Di Bucchianico et al. [32] | NiO                 | X                                          |             |               | X             | X      | X     | X            |             | X              | X              |
| Duan et al. [33]           | NiO                 | X                                          |             |               | X             | X      | X     |              | X           |                | X              |
| Dumala et al. [34]         | NiO                 | X                                          |             |               | X             | X      | X     | X            | X           |                |                |
| Dumala et al. [35]         | NiO                 | X                                          |             | X             | X             | X      | X     |              | X           |                | X              |
| Dumala et al. [36]         | NiO                 | X                                          |             | X             | X             |        | X     | X            | X           |                | X              |
| Dumala et al. [37]         | NiO                 | X                                          | X           | X             | X             | X      | X     | X            | X           |                | X              |
| Fujita et al. [38]         | NiO                 | X                                          |             |               | X             |        | X     | X            |             |                | X              |
| Gillespie et al. 2010 [22] | Ni(OH) <sub>2</sub> | X                                          | X           |               | X             | X      | X     |              |             | X              | X              |
| Gutierrez et al. [17]      | NiO                 | X                                          |             |               | X             |        |       | X            | X           |                | X              |
| Horie et al. [39]          | NiO                 | X                                          | X           |               | X             | X      | X     |              |             |                | X              |
| Horie et al. [40]          | NiO                 |                                            |             |               | X             | X      |       | X            |             |                |                |
| Horie et al. [41]          | NiO                 |                                            |             |               | X             |        |       |              |             |                | X              |
| Horie et al. [42]          | NiO                 |                                            |             |               | X             |        |       | X            |             |                | X              |
| Horie et al. [43]          | NiO                 |                                            | X           | X             | X             | X      | X     | X            |             |                |                |

| Study                   | Nanoparticle Type         | Oxidic Nickel Nanoparticle Characteristics |             |               |               |        |       |              |             |                |                |
|-------------------------|---------------------------|--------------------------------------------|-------------|---------------|---------------|--------|-------|--------------|-------------|----------------|----------------|
|                         |                           | Agglomeration                              | Composition | Crystallinity | Particle Size | Purity | Shape | Surface Area | Sur. Charge | Sur. Chemistry | Char. in Media |
| Horie et al. [19]       | NiO<br>(Green)<br>(Black) | X                                          |             |               | X             | X      |       | X            |             |                | X              |
| Jeong et al. [44]       | NiO                       | X                                          |             |               | X             |        |       | X            | X           |                | X              |
| Kadoya et al. [45]      | NiO                       | X                                          |             |               | X             |        | X     | X            |             |                | X              |
| Kang et al. [46]        | Ni(OH) <sub>2</sub>       | X                                          | X           |               | X             | X      | X     |              |             | X              | X              |
| Kang et al. [47]        | Ni(OH) <sub>2</sub>       | X                                          | X           |               | X             | X      | X     |              |             | X              | X              |
| Katsnelson et al. [48]  | NiO                       |                                            | X           |               | X             | X      | X     |              |             |                | X              |
| Latvala et al. [21]     | NiO                       | X                                          |             |               | X             | X      | X     | X            |             |                | X              |
| Lee et al. [49]         | NiO                       | X                                          |             |               | X             |        | X     | X            | X           |                | X              |
| Liberda et al. [50]     | Ni(OH) <sub>2</sub>       | X                                          | X           |               | X             | X      | X     |              |             | X              | X              |
| Liberda et al. [51]     | Ni(OH) <sub>2</sub>       | X                                          | X           |               | X             | X      | X     |              |             | X              | X              |
| Liberda [52]            | Ni(OH) <sub>2</sub>       | X                                          | X           |               | X             | X      | X     |              |             | X              | X              |
| Lu et al. [53]          | NiO                       |                                            |             |               | X             |        |       | X            |             |                |                |
| Lu et al. [54]          | NiO                       |                                            |             |               | X             |        | X     |              |             |                |                |
| Marzban et al. [55]     | NiO                       |                                            | X           | X             | X             | X      | X     | X            |             |                |                |
| Minigalieva et al. [56] | NiO                       | X                                          | X           |               | X             | X      | X     |              |             |                | X              |
| Minigalieva et al. [57] | NiO                       |                                            | X           |               | X             | X      | X     |              |             |                |                |
| Morimoto et al. [58]    | NiO                       | X                                          |             |               | X             | X      | X     | X            |             |                | X              |
| Morimoto et al. [59]    | NiO                       | X                                          | X           |               | X             | X      | X     |              |             |                | X              |
| Morimoto et al. [60]    | NiO                       | X                                          |             |               | X             | X      |       | X            |             |                | X              |
| Morimoto et al. [61]    | NiO                       | X                                          |             |               | X             | X      |       | X            |             |                | X              |
| Morimoto et al. [62]    | NiO                       | X                                          |             |               | X             | X      |       | X            |             |                | X              |
| Nishi et al. [63]       | NiO                       | X                                          |             |               | X             | X      | X     | X            |             |                | X              |
| Nishi et al. [23]       | NiO                       | X                                          |             |               | X             | X      | X     | X            |             |                | X              |
| Ogami et al. [64]       | NiO                       | X                                          |             |               | X             | X      |       | X            |             |                | X              |
| Ogami et al. [65]       | NiO                       | X                                          |             |               | X             | X      | X     | X            |             |                |                |
| Oyabu et al. [66]       | NiO                       | X                                          |             |               | X             | X      | X     | X            |             |                | X              |
| Oyabu et al. [67]       | NiO                       | X                                          |             | X             | X             | X      | X     | X            |             |                | X              |
| Pietruska et al. [68]   | NiO                       | X                                          | X           | X             | X             | X      | X     | X            | X           | X              | X              |

| Study                 | Nanoparticle Type | Oxidic Nickel Nanoparticle Characteristics |             |               |               |        |       |              |             |                |                |
|-----------------------|-------------------|--------------------------------------------|-------------|---------------|---------------|--------|-------|--------------|-------------|----------------|----------------|
|                       |                   | Agglomeration                              | Composition | Crystallinity | Particle Size | Purity | Shape | Surface Area | Sur. Charge | Sur. Chemistry | Char. in Media |
| Sager et al. [15]     | NiO               | X                                          |             |               |               |        | X     |              | X           |                | X              |
| Saquib et al. [69]    | NiO               | X                                          |             |               | X             |        | X     |              | X           |                | X              |
| Senoh et al. [70]     | NiO               | X                                          |             |               | X             | X      | X     |              |             |                | X              |
| Shinohara et al. [20] | NiO               | X                                          |             | X             | X             |        | X     | X            |             |                | X              |
| Siddiqui et al. [71]  | NiO               | X                                          |             | X             | X             | X      | X     |              |             |                | X              |
| Sutunkova et al. [72] | NiO               |                                            | X           |               | X             |        | X     |              |             |                | X              |
| Yu et al. [73]        | NiO               |                                            |             | X             | X             | X      |       | X            |             |                |                |

**Table S2.** *In vitro* literature associated with various endpoints after exposure to oxidic nickel nanoparticles.

| Study                 | Nanoparticle (NP) Type | Klimisch Score              | Cell Type(s) (Organ or Tissue) | Dosing Regimen: Exposure Method Dose Range & Unit Duration/Frequency Follow-up Time | Health Endpoint (Assay)                                                                                           | Key Findings and Results                                                                                                                                                                                                                                                                                                                                                                                                                                                                         |
|-----------------------|------------------------|-----------------------------|--------------------------------|-------------------------------------------------------------------------------------|-------------------------------------------------------------------------------------------------------------------|--------------------------------------------------------------------------------------------------------------------------------------------------------------------------------------------------------------------------------------------------------------------------------------------------------------------------------------------------------------------------------------------------------------------------------------------------------------------------------------------------|
| Cho et al. [14]       | NiO                    | K2<br>Not a guideline study | A549 (Lung)                    | 30, 100, 300 cm <sup>2</sup> /mL or 32.7-327 µg/mL<br>24 h                          | Cytotoxicity (Trypan blue exclusion assay)<br>Inflammation (Cytokines, transcription factors)                     | NiO NPs were cytotoxic and released IL-8 at the highest dose of 300 cm <sup>2</sup> /mL while the aqueous extracts were all negative. NiO NPs did not induce any changes in the transcription factors AP-1 or NF-kB. Zinc oxide and copper oxide NPs displayed cytotoxicity, IL-8 production, and activation of transcription factors at various lower doses ranging between 3 to 30 cm <sup>2</sup> /mL. Aqueous extracts of zinc but not copper nanoparticles also displayed cellular effects. |
| Lu et al. [53]        | NiO                    | K2<br>Not a guideline study | A549 (Lung)                    | 9.375-300 cm <sup>2</sup> /mL<br>100-3,240 µg/mL<br>24 h                            | Free radical generation (EPR)<br>Oxidative potential (DCF)<br>Cytotoxicity (LDH)<br>Hemolysis (Spectrophotometry) | A wide variety of metal oxide nanoparticles were compared for cell free ROS generation. NiO NPs, cobalt oxide NPs, and carbon black NP induced ROS in both cell free systems (EPR and DCF assay); cerium oxide NP induced ROS production by the EPR method only. Cytotoxicity was dose-dependent for NiO NPs, cerium oxide, and carbon black beginning at 150 cm <sup>2</sup> /mL. ROS generation <i>in vitro</i> did not correlate with inflammation activity <i>in vivo</i> .                  |
| Pietruska et al. [68] | NiO                    | K2<br>Not a guideline study | NCI-H460 (Lung)<br>NHBE (Lung) | 5-20 µg/cm <sup>2</sup><br>or 8-32 µg/mL*<br>2-72 h                                 | Hypoxia (protein markers)<br>Cytotoxicity (cell number)<br>Apoptosis (caspase activation)                         | NiO NPs were compared with micron-sized metallic nickel particles for nickel bioavailability, release of ions, activation of HIF-1α, cytotoxicity, and apoptosis. Uptake of NiO NPs was associated with the release of ions from 24 to 48 h. 50% of the available nickel was mobilized in the NiO NPs. NiO NPs induced HIF-1α activation but with different kinetics. NiO NPs induced activation of caspase-3 while the micron-sized particles were negative for caspase-3 activation.           |

| Study               | Nanoparticle (NP) Type | Klimisch Score              | Cell Type(s) (Organ or Tissue) | Dosing Regimen: Exposure Method Dose Range & Unit Duration/Frequency Follow-up Time | Health Endpoint (Assay)                                                                                                                                                                                                                                                       | Key Findings and Results                                                                                                                                                                                                                                                                                                                                                                                                                                                                                                                                                                                                                                                                                                                                                                                                                                                                                                                                         |
|---------------------|------------------------|-----------------------------|--------------------------------|-------------------------------------------------------------------------------------|-------------------------------------------------------------------------------------------------------------------------------------------------------------------------------------------------------------------------------------------------------------------------------|------------------------------------------------------------------------------------------------------------------------------------------------------------------------------------------------------------------------------------------------------------------------------------------------------------------------------------------------------------------------------------------------------------------------------------------------------------------------------------------------------------------------------------------------------------------------------------------------------------------------------------------------------------------------------------------------------------------------------------------------------------------------------------------------------------------------------------------------------------------------------------------------------------------------------------------------------------------|
| Capasso et al. [30] | NiO                    | K2<br>Not a guideline study | BEAS-2B (Lung)<br>A549 (Lung)  | 20, 40, 60, 80, 100 µg/mL<br>45 m, 2 h, 24 h                                        | Cytotoxicity (MTT, Alamar Blue)<br>Inflammation (cytokine levels, protein levels)<br>Oxidation Potential (ROS generation)<br>Apoptosis/necrosis (Hoechst 33342/propidium iodide, cell cycle)<br>Genotoxicity (immunocytochemistry)<br>Cell cycle progression (Flow cytometry) | NiO NPs caused a decrease in cytotoxicity in a dose-dependent manner for both cell lines. There was an increase in apoptotic and necrotic cells in both cell lines. ROS generation was increased after exposure to NiO NPs for BEAS-2B cells, but not A549 cells. For both cell lines, IL-6 and IL-8 were elevated; based on the level of phosphorylated NF-κβ, the level of IκB-α, and levels of JNK and p38, the release of IL-6 and IL-8 was dependent on mitogen activated protein kinases cascade through the induction of NF-κB pathway. There was no increase in IL-1β. NiO NPs caused changes to the cell cycle in both cell lines. Immunocytochemistry showed a significant nuclear translocation of phospho-ATM and phospho-ATR. NiO NPs caused a dose-dependent decrease in G1 phase and a corresponding increase in G2/M phase to A549 cells and an increase in G1 phase and subG1 phase and corresponding decrease in G2/M phase for BEAS-2B cells. |
| Duan et al. [33]    | NiO                    | K2<br>Not a guideline study | BEAS-2B (Lung)                 | 1.25-20 µg/cm <sup>2</sup><br>or 2-32 µg/mL*<br>24, 48 h                            | Cytotoxicity (Cell count)<br>Apoptosis (flow cytometry, caspase-3, protein levels, immunoprecipitation, gene expression, cell transfection)                                                                                                                                   | Ni <sup>2+</sup> ions were released within the cell. The NiO NPs caused a dose-dependent decrease in cell viability. Apoptotic cells increased in a dose-dependent manner and the level of caspase-3 was increased. SIRT1, an anti-apoptosis protein, was significantly decreased at both the protein and transcript levels; coimmunoprecipitation assays showed the levels of p53 were decreased, yet there were no significant changes in the transcript levels; however, the acetylation of p53 at the lys382 was significantly increased. Additionally, the expression of Bax was increased after NiO NP treatment. By using resveratrol, an activator of SIRT1, during the exposure to the NiO NPs, the number of apoptotic cells was reduced and the gene levels were not as elevated.                                                                                                                                                                     |

| Study                      | Nanoparticle (NP) Type | Klimisch Score              | Cell Type(s) (Organ or Tissue)  | Dosing Regimen: Exposure Method Dose Range & Unit Duration/Frequency Follow-up Time | Health Endpoint (Assay)                                                                                                                                                                      | Key Findings and Results                                                                                                                                                                                                                                                                                                                                                                                                                                |
|----------------------------|------------------------|-----------------------------|---------------------------------|-------------------------------------------------------------------------------------|----------------------------------------------------------------------------------------------------------------------------------------------------------------------------------------------|---------------------------------------------------------------------------------------------------------------------------------------------------------------------------------------------------------------------------------------------------------------------------------------------------------------------------------------------------------------------------------------------------------------------------------------------------------|
| Di Bucchianico et al. [32] | NiO                    | K2<br>Not a guideline study | BEAS-2B (Lung)                  | 1, 5, 10 µg/mL<br>24 h (SEE NOTE)                                                   | Cytotoxicity (Annexin V-FITC/PI staining)<br>ROS generation (fluorescent probes)<br>Genotoxicity (cytokinesis--block micronucleus assay, chromosomal aberration, comet assay)                | NiO NPs induced apoptosis in a dose-dependent manner. NiO NPs increased the frequency of micronuclei, nucleoplasmic bridges, nuclear buds, and chromosome-type aberrations in BEAS-2B cells exposed to NiO NPs. 1, 5, 10 µg/mL NiO NPs induced DNA strand breaks. NiO NPs induced intracellular ROS.                                                                                                                                                    |
| Gutierrez et al. [17]      | NiO                    | K2<br>Not a guideline study | A549 (Lung)<br>16HBE14o- (Lung) | 0.01, 0.1, 0.5, 10, 100 µg/mL<br>4, 24 h                                            | Inflammation (gene expression)<br>Oxidative stress (gene expression)                                                                                                                         | Compared the effects of in vitro dispersion techniques on the NP physicochemistry and toxicological effects. Determined that the NiO NPs interfered with the ELISA assay. There was high variability in HO-1 expression among the different NiO concentrations and dispersion medias. One dispersion media produced significant elevation in HO-1, while the other did not. The dispersion media differentially affected NP physicochemical properties. |
| Latvala et al. [21]        | NiO                    | K2<br>Not a guideline study | A549 (Lung)                     | 0.1-40 µg/cm <sup>2</sup><br>or 0.16-64 µg/mL*<br>4, 24, 48 h                       | Cytotoxicity (Alamar Blue, colony forming efficiency)<br>Oxidation Potential (intracellular ROS)<br>DNA damage (alkaline single cell comet assay)<br>NP localization (TEM, Ni concentration) | All NPs showed increased cytotoxicity in the highest doses and an increase in proliferation at low doses when assayed by the colony forming efficiency. NiO NPs caused the generation of ROS and DNA damage; however, no intracellular ROS was detected for any of the particles. All particles were taken up by the cells within 4 hours and remained in the cell after 24 hour post-incubation.                                                       |

| Study             | Nanoparticle (NP) Type | Klimisch Score              | Cell Type(s) (Organ or Tissue) | Dosing Regimen: Exposure Method Dose Range & Unit Duration/Frequency Follow-up Time | Health Endpoint (Assay)                                                                                                                             | Key Findings and Results                                                                                                                                                                                                                                                                                                                                                                                                                                                                                                                                             |
|-------------------|------------------------|-----------------------------|--------------------------------|-------------------------------------------------------------------------------------|-----------------------------------------------------------------------------------------------------------------------------------------------------|----------------------------------------------------------------------------------------------------------------------------------------------------------------------------------------------------------------------------------------------------------------------------------------------------------------------------------------------------------------------------------------------------------------------------------------------------------------------------------------------------------------------------------------------------------------------|
| Lu et al. [54]    | NiO                    | K2<br>Not a guideline study | A549 (Lung)                    | 25-200 µg/mL<br>4 h                                                                 | Cytotoxicity (MTT, LDH)<br>Oxidation Potential (ROS generation)<br>Apoptosis (Flow cytometry by PI) and distribution of Ni, Fe, Cu and Zn in cells. | NiO NPs were cytotoxic, increased the generation of ROS and increased the number of apoptotic cells. The fluorescent intensity of metal in the cells were in the following pattern: Cu>Zn>Fe>Ni, indicating Ni was the least absorbed material. The metals were located in the perinuclear and cytoplasmic areas. Zinc oxide NPs were the most cytotoxic material and UFP caused the highest levels of ROS and apoptotic cells. The manufactured metal oxide NPs were not as cytotoxic as the environmental UFP particles.                                           |
| Horie et al. [43] | NiO                    | K2<br>Not a guideline study | A549 (Lung)<br>HaCaT (Skin)    | 10-100,000 µg/mL<br>24 h, 7 d                                                       | Cytotoxicity (MTT, LDH assay, clonogenic assay)                                                                                                     | 1 mg/mL and above displayed notable effects on protein absorption and cytotoxicity for all particles while NiO NPs and zinc oxide NPs induced cytotoxicity at lower concentrations of 0.1 and 0.01 mg/mL, respectively. Salt concentration was able to enhance protein absorption. Aqueous extracts of NiO NPs and zinc oxide NPs induced cytotoxicity while the aqueous extracts of other metal oxide NPs were negative. Ion release was detected for both NiO NP and zinc oxide; however, NiO NP ion release was only marginal at 1 mg/mL compared with 100 mg/mL. |



| Study                   | Nanoparticle (NP) Type | Klimisch Score              | Cell Type(s) (Organ or Tissue)                         | Dosing Regimen: Exposure Method Dose Range & Unit Duration/Frequency Follow-up Time | Health Endpoint (Assay)                                                                                  | Key Findings and Results                                                                                                                                                                                                                                                                                                                                                                                                                                                                                                                                                                                                                                                                                                                                                                                                                                                                                        |
|-------------------------|------------------------|-----------------------------|--------------------------------------------------------|-------------------------------------------------------------------------------------|----------------------------------------------------------------------------------------------------------|-----------------------------------------------------------------------------------------------------------------------------------------------------------------------------------------------------------------------------------------------------------------------------------------------------------------------------------------------------------------------------------------------------------------------------------------------------------------------------------------------------------------------------------------------------------------------------------------------------------------------------------------------------------------------------------------------------------------------------------------------------------------------------------------------------------------------------------------------------------------------------------------------------------------|
| Horie et al. [19]       | NiO (Green) (Black)    | K2<br>Not a guideline study | A549 (Lung)<br>HaCaT (Skin)                            | 100-10,000 µg/mL<br>24 h, 7 d                                                       | Cytotoxicity (MTT, LDH assay, clonogenic assay)                                                          | Ultra-fine NiO NP cytotoxicity was greater than fine-sized nickel particles; doses for NiO NP toxicity were high and ranged from 0.1 to 10 mg/mL. Aqueous extracts of the NiO NPs also induced cytotoxicity. NiO NPs released greater amounts of ions compared with larger particles on a per weight basis. More ion release was observed in cell media compared with water. Two different crystalline phases of NiO NPs (green vs black) were tested and green NiO NPs induced greater cytotoxicity and greater ion release compared with black NiO NPs. Sedimentation and size stabilization factors were used to determine that aggregation state did not affect the cytotoxic response but was dependent on the concentration of nickel. Cytotoxicity-pulsing experiments were used to display that a 6 h wash returned NiCl <sub>2</sub> to control levels while NiO NPs did not return to control levels. |
| Siddiqui et al. [71]    | NiO                    | K2<br>Not a guideline study | HEp-2 (Lung)<br>MCF-7 (Breast)                         | 1-100 µg/mL<br>24 h                                                                 | Cytotoxicity (MTT, NRU)<br>ROS (DCF, lipid peroxidation, GSH)<br>Apoptosis (caspase-3, DNA ladder assay) | NiO NPs induced cytotoxicity, ROS, and apoptosis in a dose-dependent manner starting at 2 µg/mL. Exposure to curcumin (antioxidant) reduced the levels of cytotoxicity, ROS, and apoptosis.                                                                                                                                                                                                                                                                                                                                                                                                                                                                                                                                                                                                                                                                                                                     |
| Minigalieva et al. [57] | NiO                    | K2<br>Not a guideline study | MRC-5 (Lung)<br>THP-1 (Blood)<br>SH-SY5Y (Bone marrow) | 3.125, 6.25, 12.5, 25, 50 µg/mL<br>24 h                                             | Cytotoxicity (MTS, ATP, tyrosine hydroxylase)                                                            | NiO NPs were cytotoxic in a dose-dependent manner. Mn <sub>2</sub> O <sub>4</sub> NPs were more cytotoxic than NiO NPs. Ni NP dissolution was dependent on the media it was suspended in and the addition of fetal bovine serum enhanced dissolution.                                                                                                                                                                                                                                                                                                                                                                                                                                                                                                                                                                                                                                                           |

| Study                 | Nanoparticle (NP) Type | Klimisch Score              | Cell Type(s) (Organ or Tissue)         | Dosing Regimen: Exposure Method Dose Range & Unit Duration/Frequency Follow-up Time | Health Endpoint (Assay)                                                                                                                                                | Key Findings and Results                                                                                                                                                                                                                                                                                                                                                                                                                                                                                                                                                                                                                                                  |
|-----------------------|------------------------|-----------------------------|----------------------------------------|-------------------------------------------------------------------------------------|------------------------------------------------------------------------------------------------------------------------------------------------------------------------|---------------------------------------------------------------------------------------------------------------------------------------------------------------------------------------------------------------------------------------------------------------------------------------------------------------------------------------------------------------------------------------------------------------------------------------------------------------------------------------------------------------------------------------------------------------------------------------------------------------------------------------------------------------------------|
| Åkerlund et al. [26]  | NiO                    | K2<br>Not a guideline study | HBEC (Lung) mES (embryonic stem cells) | 5, 10, 25, 50 µg/mL<br>24 h                                                         | Cytotoxicity (Alamar blue; Histone γ-H2AX)<br>Genotoxicity (Comet assay, Hprt mutation assay, ToxTracker reporter)<br>ROS generation (fluorescent probes)              | NiO NPs were not cytotoxic at any tested dose. There was a statistically significant increase in DNA strand breaks for HBECs exposed to 5, 10, 25 µg/mL NiO NPs. However, there was no increase in DNA double strand breaks, assessed via γ-H2AX staining, after exposure to NiO NPs. Additionally, NiO NPs induced ROS generation. Results from the ToxTracker reporter lines suggest that NiO NPs trigger the oxidative stress reporter Srxnl and Ddit3 report (protein stress). There was a statistically significant increase in mutation frequency for mES cells exposed to 0.5 µg/mL NiO NPs. There was no increase in mutation frequency for 1 or 5 µg/mL NiO NPs. |
| Dumala et al. [37]    | NiO                    | K2<br>Not a guideline study | HPBL Lymphocytes (Immune)              | 0.1, 1, 5, 10, 20, 50 and 100 µg/mL<br>24 h                                         | Cytotoxicity (trypan blue, apoptosis)<br>Genotoxicity (cytokinesis-block micronucleus assay, comet assay)<br>ROS generation (fluorescent probes)<br>Lipid peroxidation | The 50% inhibitory concentration after 24 hours of treatment was estimated as 23.58 µg/mL. There was a statistically significant increase in the incidence of micronucleus frequency for lymphocytes dosed with 25 and 50 µg/mL NiO NPs. Further, there was a statistically significant increase in % of tail DNA and increased incidence of micronucleus frequency for lymphocytes dosed with 25 and 50 µg/mL. The authors noted that the cytotoxicity data was correlated with the genotoxicity data. NiO NP exposure also induced ROS generation and lipid peroxidation.                                                                                               |
| Abudayyak et al. [24] | NiO                    | K2<br>Not a guideline study | SH-SY5Y (Brain)                        | 0-500 µg/mL<br>24 h                                                                 | Cytotoxicity (MTT, NRU)<br>Genotoxicity (Comet Assay)<br>Oxidative potentials (enzymes)<br>Apoptotic potentials (Annexin V-FITC)                                       | NiO NPs were taken up by the cells in a dose-dependent manner. 229.34 µg/mL caused a 50% inhibition in cell viability. Additionally, NiO NPs caused dose-dependent DNA damage and apoptosis and significantly induced oxidative damage. TEM images showed that 50 and 150 µg/mL caused ultrastructural changes to the cells, invisible mitochondria, indentations of nuclear membrane, abnormal nuclei with nuclear fragmentation, and chromatin condensation. Additionally, cytoplasmic vacuoles with internalized particles were observed.                                                                                                                              |

| Study           | Nanoparticle (NP) Type | Klimisch Score              | Cell Type(s) (Organ or Tissue) | Dosing Regimen: Exposure Method Dose Range & Unit Duration/Frequency Follow-up Time                                   | Health Endpoint (Assay)                                                                                                             | Key Findings and Results                                                                                                                                                                                                                                                                                                                                                                                                                                                                                                                                                                                                                                                                                                                                                               |
|-----------------|------------------------|-----------------------------|--------------------------------|-----------------------------------------------------------------------------------------------------------------------|-------------------------------------------------------------------------------------------------------------------------------------|----------------------------------------------------------------------------------------------------------------------------------------------------------------------------------------------------------------------------------------------------------------------------------------------------------------------------------------------------------------------------------------------------------------------------------------------------------------------------------------------------------------------------------------------------------------------------------------------------------------------------------------------------------------------------------------------------------------------------------------------------------------------------------------|
| Cao et al. [29] | NiO                    | K2<br>Not a guideline study | Raw 264.7 (Immune)             | 1, 2, 4 µg/cm <sup>2</sup><br>or 1.6-6.4 µg/mL*<br>12 h<br><br>2 µg/m <sup>2</sup><br>or 3.2 µg/mL*<br>0, 6, 12, 24 h | Cytotoxicity (proliferation)<br>Inflammation (cytokine levels, mRNA levels, protein levels)<br>Oxidation Potential (ROS generation) | NiO NPs induced cytotoxicity in a dose- and time-dependent manner. The Ni <sup>2+</sup> ion concentration increased in a dose-dependent manner. NiO NPs increased the release of cytokines IL-1β in a dose- and time-dependent manner, but did not affect the levels of TNF-α; the mRNA levels of IL-1β and TNF-α were not increased. Based on cytokine secretion levels, protein levels, and using siRNA and a Nlrp3 knockdown, it was determined that NiO NP mediated IL-1β release was dependent on Nlrp3/caspase-1 activation. NiO NPs induced ROS generation in a dose-dependent manner. Further, through experiments designed with NAC or cytochalasin D, they showed that NiO NP-induced Nlrp3 inflammasome activation coincidentally required phagocytosis and ROS production. |
| Ada et al. [25] | NiO                    | K2<br>Not a guideline study | HeLa (Cervix)                  | 50-500 µg/mL<br>2-16 h                                                                                                | Cytotoxicity (cell counts)<br>Apoptosis (double and M30 staining)                                                                   | Cytotoxicity and induction of apoptosis were dose- and time-dependent. Cytotoxicity increased at 50 µg/mL NiO NP and higher. Apoptosis pathway was not determined and statistics for individual doses were not clear.                                                                                                                                                                                                                                                                                                                                                                                                                                                                                                                                                                  |

NiO NP: Nickel oxide nanoparticles; MTT: (3-(4,5-dimethylthiazol-2-yl)-2,5-diphenyltetrazolium bromide; LDH: lactate dehydrogenase; NRU: Neutral Red Uptake; GSH: Glutathione; DCF: 2',7'-dichlorofluorescein; TEM: Transmission electron microscopy; PI: Propidium iodide; EPR: Electron Paramagnetic Resonance; ROS: Reactive oxygen species
